# Supplementary material for: High-throughput untargeted metabolomics and chemometrics reveals pharmacological action and molecular mechanism of chuanxiong by ultra performance liquid chromatography combined with quadrupole-time-of-flight-mass spectrometry
Source: Royal Society of Chemistry journal article supplement (doi:10.1039/c9ra06267j), 2019-01-01
Supplement: c9ra06267j1.pdf [file c9ra06267j1.pdf]

Table S1: The information of biomarkers in the serum of lung cancer

| NO | Rt/min | M/Z      | Scan mode | M+X | Proposed composition                                            | Predicting compound          | HMDB ID     | Mass Error (ppm) | Chang trend |
|----|--------|----------|-----------|-----|-----------------------------------------------------------------|------------------------------|-------------|------------------|-------------|
| 1  | 2.55   | 514.2835 | ESI+      | M+H | C <sub>26</sub> H <sub>43</sub> NO <sub>7</sub> S               | Sulfolithocholyglycine       | HMDB0002639 | 0.35             | ↓**         |
| 2  | 3.03   | 512.2683 | ESI-      | M-H | C <sub>26</sub> H <sub>43</sub> NO <sub>7</sub> S               | Sulfolithocholyglycine       | HMDB0002639 | -0.94            | ↓**         |
| 3  | 3.08   | 373.2741 | ESI+      | M+H | C <sub>24</sub> H <sub>36</sub> O <sub>3</sub>                  | Cervonoyl ethanolamide       | HMDB0013627 | 0.89             | ↑*          |
| 4  | 3.14   | 389.2688 | ESI+      | M+H | C <sub>24</sub> H <sub>36</sub> O <sub>4</sub>                  | Cavipetin C                  | HMDB0030366 | 0.39             | ↑*          |
| 5  | 3.64   | 209.084  | ESI-      | M-H | C <sub>11</sub> H <sub>14</sub> O <sub>4</sub>                  | Sinapyl alcohol              | HMDB0013070 | 9.77             | ↑**         |
| 6  | 3.94   | 514.2833 | ESI-      | M-H | C <sub>26</sub> H <sub>45</sub> NO <sub>7</sub> S               | Taurocholic acid             | HMDB0000036 | -2.14            | ↓*          |
| 7  | 4.44   | 357.2794 | ESI+      | M+H | C <sub>24</sub> H <sub>36</sub> O <sub>2</sub>                  | Tetracosahexaenoic acid      | HMDB0002007 | 1.65             | ↑**         |
| 8  | 4.5    | 405.2638 | ESI-      | M-H | C <sub>24</sub> H <sub>38</sub> O <sub>5</sub>                  | 7-Ketodeoxycholic acid       | HMDB0000391 | -1.98            | ↑**         |
| 9  | 4.92   | 520.3403 | ESI+      | M+H | C <sub>26</sub> H <sub>50</sub> NO <sub>7</sub> P               | LysoPC(18:2(9Z,12Z))         | HMDB0010386 | 1.03             | ↑**         |
| 10 | 4.93   | 544.34   | ESI+      | M+H | C <sub>28</sub> H <sub>50</sub> NO <sub>7</sub> P               | LysoPC(20:4(5Z,8Z,11Z,14Z))  | HMDB0010395 | 0.42             | ↑**         |
| 11 | 5.02   | 498.2873 | ESI-      | M-H | C <sub>26</sub> H <sub>45</sub> NO <sub>6</sub> S               | Tauroursodeoxycholic acid    | HMDB0000874 | -4.43            | ↑**         |
| 12 | 5.13   | 544.3403 | ESI+      | M+H | C <sub>28</sub> H <sub>50</sub> NO <sub>7</sub> P               | LysoPC(20:4(5Z,8Z,11Z,14Z))  | HMDB0010395 | 0.93             | ↑**         |
| 13 | 5.62   | 391.2844 | ESI-      | M-H | C <sub>24</sub> H <sub>40</sub> O <sub>4</sub>                  | Allodeoxycholic acid         | HMDB0000478 | -2.56            | ↓**         |
| 14 | 5.7    | 496.34   | ESI+      | M+H | C <sub>24</sub> H <sub>50</sub> NO <sub>7</sub> P               | LysoPC(16:0)                 | HMDB0010382 | 0.43             | ↑**         |
| 15 | 5.7    | 518.3215 | ESI+      | M+H | C <sub>26</sub> H <sub>48</sub> NO <sub>7</sub> P               | LysoPC(18:3(6Z,9Z,12Z))      | HMDB0010387 | -4.99            | ↑**         |
| 16 | 5.76   | 522.3558 | ESI+      | M+H | C <sub>26</sub> H <sub>52</sub> NO <sub>7</sub> P               | LysoPC(18:1(9Z))             | HMDB0002815 | 0.77             | ↑*          |
| 17 | 7.14   | 265.147  | ESI-      | M-H | C <sub>15</sub> H <sub>22</sub> O <sub>4</sub>                  | Humulinic acid A             | HMDB0030104 | 9.39             | ↑**         |
| 18 | 7.15   | 524.3714 | ESI+      | M+H | C <sub>26</sub> H <sub>54</sub> NO <sub>7</sub> P               | LysoPC(18:0)                 | HMDB0010384 | 0.65             | ↑**         |
| 19 | 7.15   | 546.3528 | ESI+      | M+H | C <sub>28</sub> H <sub>52</sub> NO <sub>7</sub> P               | LysoPC(20:3(5Z,8Z,11Z))      | HMDB0010393 | -4.72            | ↑**         |
| 20 | 7.96   | 256.2637 | ESI+      | M+H | C <sub>16</sub> H <sub>33</sub> NO                              | Palmitic amide               | HMDB0012273 | 0.97             | ↓**         |
| 21 | 8.26   | 282.2795 | ESI+      | M+H | C <sub>18</sub> H <sub>35</sub> NO                              | Oleamide                     | HMDB0002117 | 1.33             | ↓**         |
| 22 | 8.5    | 480.3088 | ESI-      | M-H | C <sub>23</sub> H <sub>48</sub> NO <sub>7</sub> P               | LysoPC(15:0)                 | HMDB0010381 | -1.49            | ↓*          |
| 23 | 8.75   | 112.9845 | ESI-      | M-H | C <sub>2</sub> HF <sub>3</sub> O <sub>2</sub>                   | Trifluoroacetic acid         | HMDB0014118 | -9.9             | ↑**         |
| 24 | 9.3    | 782.5682 | ESI+      | M+H | C <sub>44</sub> H <sub>80</sub> NO <sub>8</sub> P               | PC(16:1(9Z)/20:3(5Z,8Z,11Z)) | HMDB0008013 | -1.59            | ↑**         |
| 25 | 9.31   | 758.572  | ESI+      | M+H | C <sub>42</sub> H <sub>80</sub> NO <sub>8</sub> P               | PC(14:0/20:2(11Z,14Z))       | HMDB0007880 | 3.40             | ↑**         |
| 26 | 10.16  | 313.0776 | ESI-      | M-H | C <sub>15</sub> H <sub>14</sub> N <sub>4</sub> O <sub>2</sub> S | Sulfaphenazole               | HMDB0015667 | 3.75             | ↑**         |
| 27 | 10.18  | 165.0398 | ESI-      | M-H | C <sub>5</sub> H <sub>10</sub> O <sub>6</sub>                   | Arabinonic acid              | HMDB0000539 | -4.14            | ↑**         |
| 28 | 10.6   | 491.3381 | ESI-      | M-H | C <sub>29</sub> H <sub>48</sub> O <sub>6</sub>                  | Homodolicholide              | HMDB0033907 | 0.67             | ↓**         |
| 29 | 10.62  | 473.2896 | ESI-      | M-H | C <sub>28</sub> H <sub>42</sub> O <sub>6</sub>                  | Pubescenol                   | HMDB0030085 | -2.64            | ↑**         |
| 30 | 10.84  | 465.3061 | ESI-      | M-H | C <sub>27</sub> H <sub>46</sub> O <sub>4</sub> S                | Cholesterol sulfate          | HMDB0000653 | 3.52             | ↑**         |
| 31 | 11.09  | 313.0777 | ESI-      | M-H | C <sub>15</sub> H <sub>14</sub> N <sub>4</sub> O <sub>2</sub> S | Sulfaphenazole               | HMDB0015667 | 3.78             | ↑**         |

↑ It indicates that the metabolite content in the serum of the lung cancer model group is significantly higher than that of the control group;

↓ It indicates that the metabolite content in the serum of the lung cancer model group is significantly lower than that of the control group;

Table S2: Trends of potential biomarker treatment with high dose of chuanxiong group, low dose of chuanxiong group and protamine group.

| NO | Rt/min | M/Z      | Predicting compound          | Chang trend | HD  | LD  | PTM |
|----|--------|----------|------------------------------|-------------|-----|-----|-----|
| 1  | 2.55   | 514.2835 | Sulfolithocholyglycine       | ↓**         | +## | +#  | +   |
| 2  | 3.03   | 512.2683 | Sulfolithocholyglycine       | ↓**         | +## | +#  | +## |
| 3  | 3.08   | 373.2741 | Cervonoyl ethanolamide       | ↑*          | +## | +## | +## |
| 4  | 3.14   | 389.2688 | Cavipetin C                  | ↑*          | +#  | +## | +#  |
| 5  | 3.64   | 209.084  | Sinapyl alcohol              | ↑**         | +## | -   | -   |
| 6  | 3.94   | 514.2833 | Taurocholic acid             | ↓*          | -   | +#  | +## |
| 7  | 4.44   | 357.2794 | Tetracosahexaenoic acid      | ↑**         | +## | +## | +## |
| 8  | 4.5    | 405.2638 | 7-Ketodeoxycholic acid       | ↑**         | +   | +   | +## |
| 9  | 4.92   | 520.3403 | LysoPC(18:2(9Z,12Z))         | ↑**         | +## | +## | +## |
| 10 | 4.93   | 544.34   | LysoPC(20:4(5Z,8Z,11Z,14Z))  | ↑**         | +## | +## | +## |
| 11 | 5.02   | 498.2873 | Tauroursodeoxycholic acid    | ↑**         | -   | +#  | +## |
| 12 | 5.13   | 544.3403 | LysoPC(20:4(5Z,8Z,11Z,14Z))  | ↑**         | +## | +## | +## |
| 13 | 5.62   | 391.2844 | Allodeoxycholic acid         | ↓**         | +   | +#  | +## |
| 14 | 5.7    | 496.34   | LysoPC(16:0)                 | ↑**         | +## | +## | +## |
| 15 | 5.7    | 518.3215 | LysoPC(18:3(6Z,9Z,12Z))      | ↑**         | +## | +## | +## |
| 16 | 5.76   | 522.3558 | LysoPC(18:1(9Z))             | ↑*          | +## | +## | +## |
| 17 | 7.14   | 265.147  | Humulinic acid A             | ↑**         | +## | +   | +   |
| 18 | 7.15   | 524.3714 | LysoPC(18:0)                 | ↑**         | +## | +## | +## |
| 19 | 7.15   | 546.3528 | LysoPC(20:3(5Z,8Z,11Z))      | ↑**         | +## | +## | +## |
| 20 | 7.96   | 256.2637 | Palmitic amide               | ↓**         | +## | +## | +## |
| 21 | 8.26   | 282.2795 | Oleamide                     | ↓**         | +## | +## | +## |
| 22 | 8.5    | 480.3088 | LysoPC(15:0)                 | ↓*          | +   | -   | -   |
| 23 | 8.75   | 112.9845 | Trifluoroacetic acid         | ↑**         | +## | +## | +## |
| 24 | 9.3    | 782.5682 | PC(16:1(9Z)/20:3(5Z,8Z,11Z)) | ↑**         | +## | +## | +## |
| 25 | 9.31   | 758.572  | PC(14:0/20:2(11Z,14Z))       | ↑**         | +## | +## | +## |
| 26 | 10.16  | 313.0776 | Sulfaphenazole               | ↑**         | -   | +   | +   |
| 27 | 10.18  | 165.0398 | Arabinonic acid              | ↑**         | +   | +   | +   |
| 28 | 10.6   | 491.3381 | Homodolicholide              | ↓**         | +   | -   | -   |
| 29 | 10.62  | 473.2896 | Pubescenol                   | ↑**         | +#  | -   | -   |
| 30 | 10.84  | 465.3061 | Cholesterol sulfate          | ↑**         | +#  | -   | +   |
| 31 | 11.09  | 313.0777 | Sulfaphenazole               | ↑**         | +#  | -   | -   |

↑ It indicates that the metabolite content in the serum of the lung cancer model group is significantly higher than that of the control group;

↓It indicates that the metabolite content in the serum of the lung cancer model group is significantly lower than that of the control group;

+ Callback trend compared with the model group;

- There is no callback trend compared to the model group;

(\*P<0.05;\*\*P<0.01.# P<0.05; ## P<0.01)

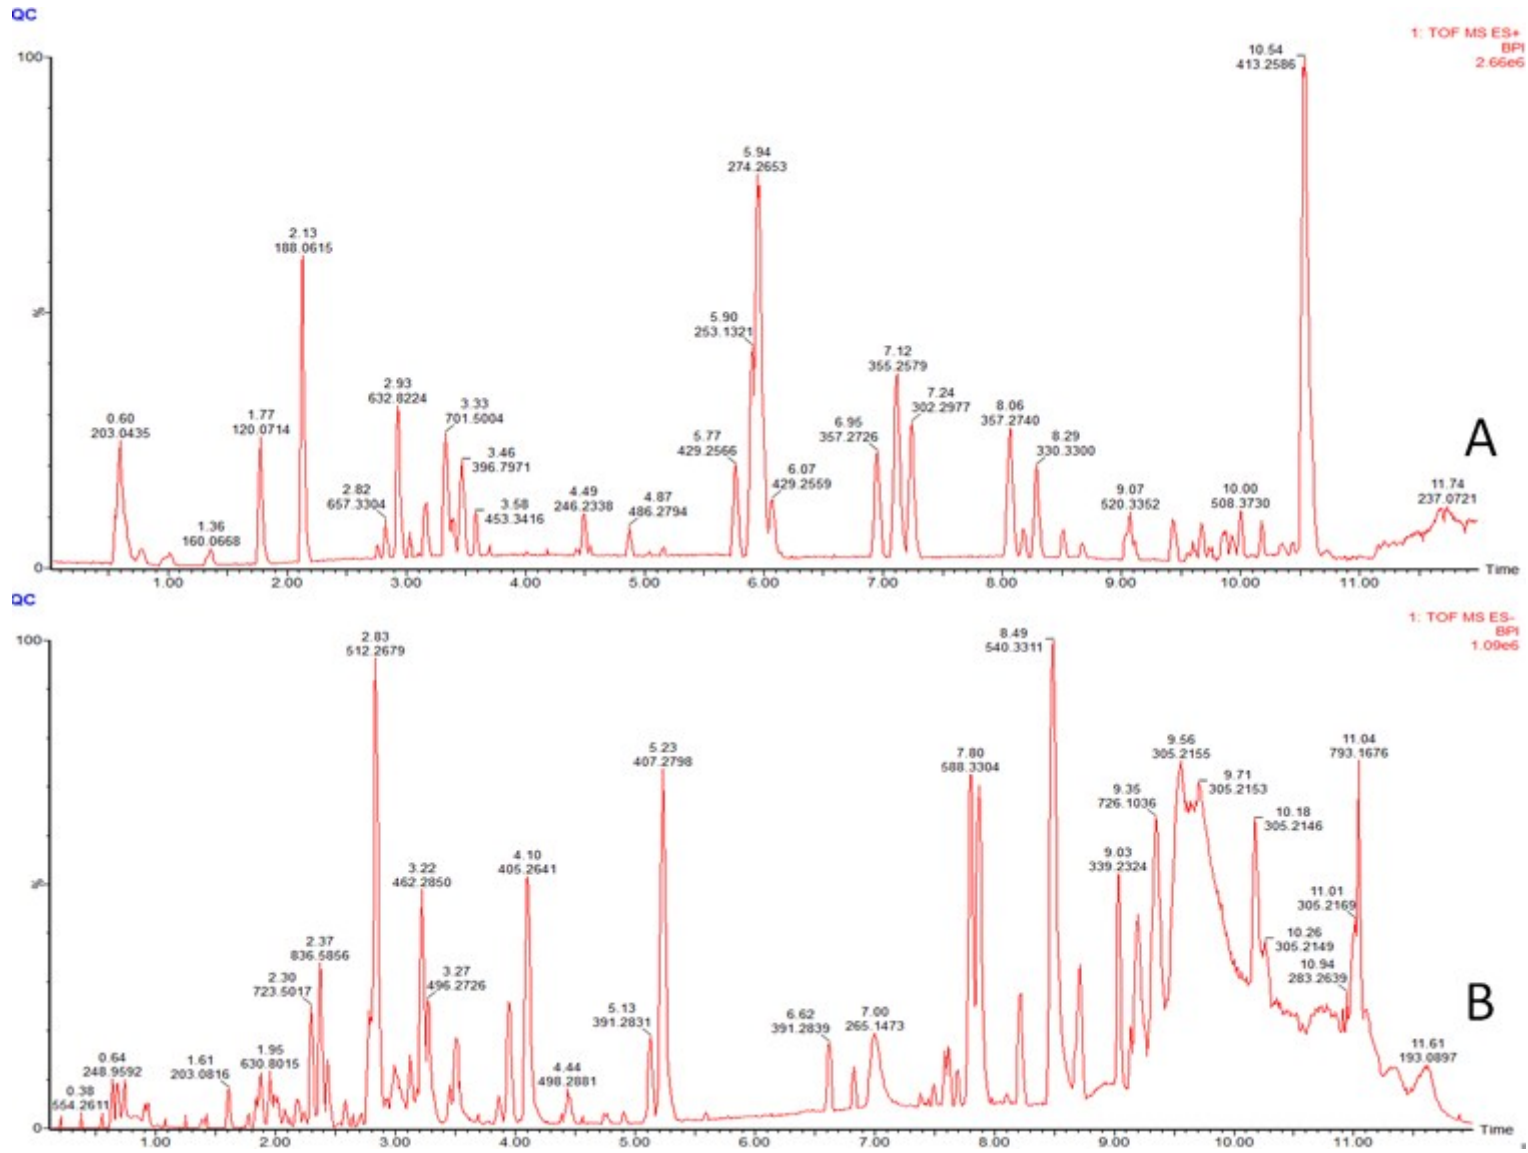

Fig.S1. UPLC-MS BPI ion map of QC. (A) Positive ion mode. (B) Negative ion mode.

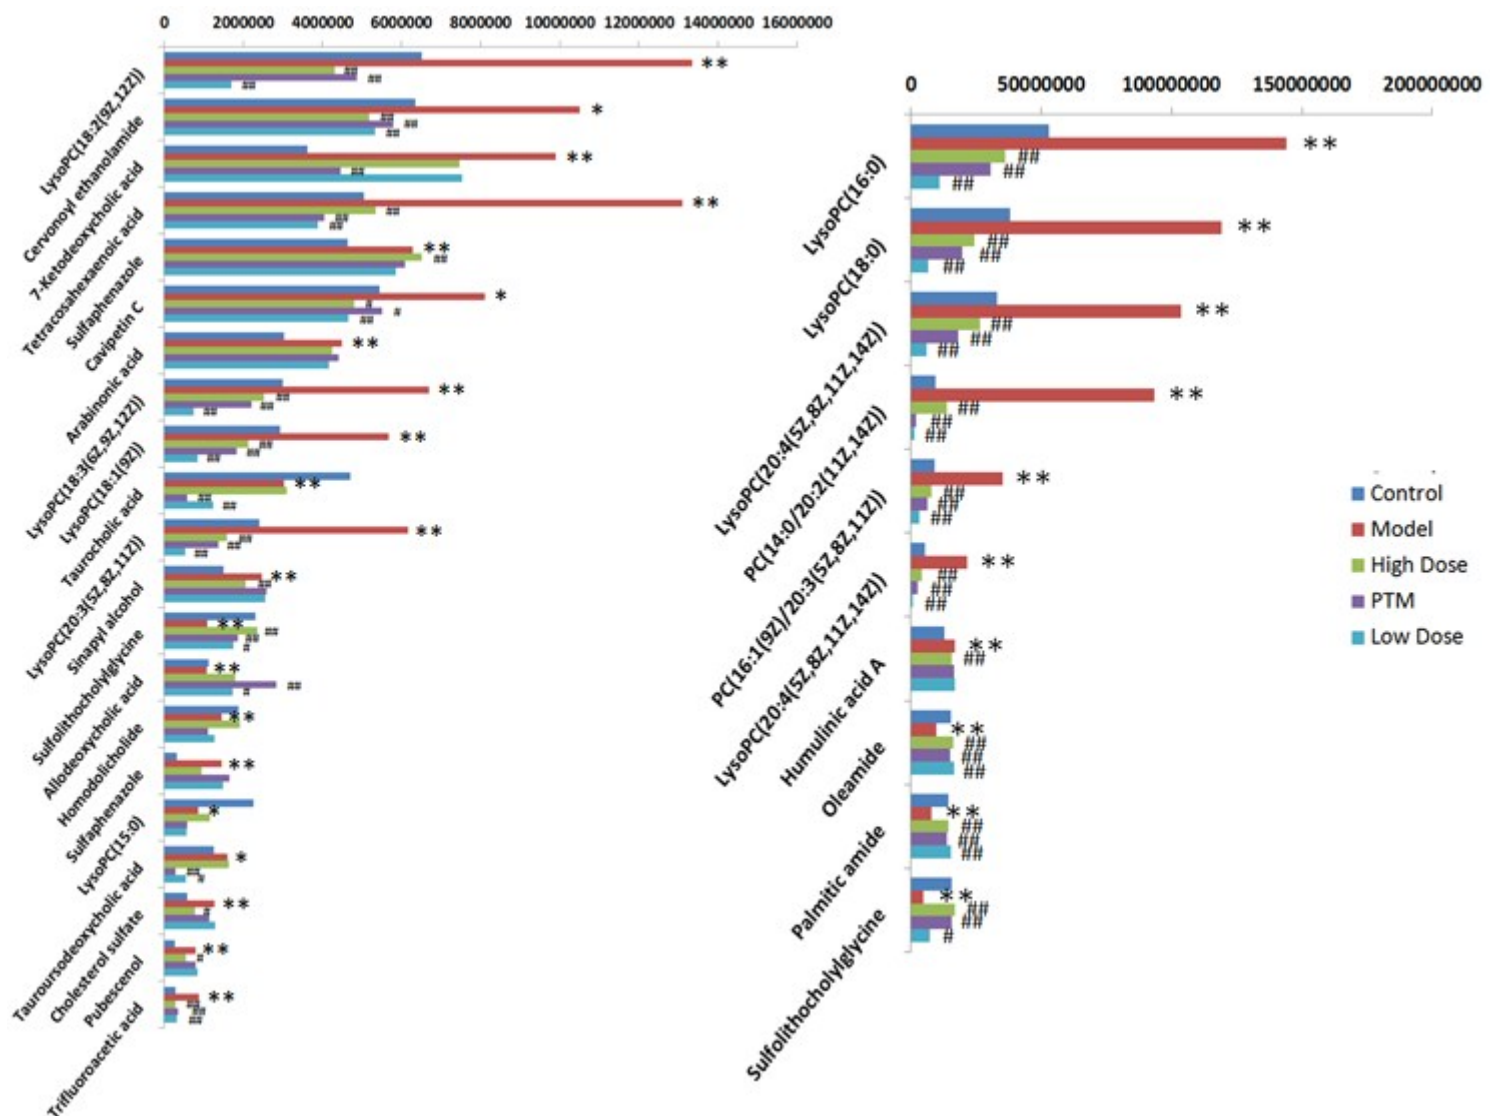

Fig.S2. The relative content of 31 potential biomarkers in each group of mice after treatment with CX solution was given. (Compare the control group to the model group, \* $P < 0.05$ , \*\* $P < 0.01$ ; comparison between model group and other group, #  $P < 0.05$ , ## $P < 0.01$ .)
